# Supplementary material
Source: PubMed Central journal article supplement (PMC3903252)
Supplement: 1306798111_pnas.201306798SI.pdf [file 1306798111_pnas.201306798SI.pdf]

# Supporting Information

Peters et al. 10.1073/pnas.1306798111

## SI Materials and Methods

**Active TGF- $\beta$  Determination and Neutralization.** Active TGF- $\beta$  levels in bronchoalveolar lavage (BAL) fluids from apparently healthy control human subjects and patients with acute respiratory distress syndrome (ARDS) were assessed by a human TGF- $\beta$ 1 ELISA (R&D Systems; DB100B), as per the manufacturer's instructions, or by a dual luciferase reporter bioassay using the firefly luciferase-based TGF- $\beta$ -responsive p(CAGA)<sub>12</sub> reporter, and a *Renilla* luciferase standardization reporter (1). TGF- $\beta$  was neutralized in cell-culture experiments with a pan-TGF- $\beta$ 1, -2, -3-neutralizing antibody (clone 1D11, MAB1835; R&D Systems), as previously described by the authors (2), at a concentration of 10  $\mu$ g/mL, along with an IgG control antibody also at 10  $\mu$ g/mL.

**Isolated, Ventilated, and Perfused Rabbit Lung.** Animal investigations received government approval (Regierungspräsidium Gießen under approval number V54-19c20/15cGI20/10). The isolation and subsequent ventilation and perfusion of rabbit lungs have been described in detail by the authors previously (3). No deviations were made from the described protocol. A standardized procedure was used in all isolated lung studies: lungs were allowed to equilibrate for 30 min, followed by a nebulization step for 10 min to deliver a pretreatment of vehicle, or pharmacological agents. After 20 min, a second nebulization of 10 min delivered TGF- $\beta$ . After 20 min, a third nebulization of 10 min delivered a 2-mL fluid challenge, which also contained two radioactive tracers, [<sup>3</sup>H]mannitol (7.2  $\mu$ Ci) and <sup>22</sup>NaCl (1.2  $\mu$ Ci), to assess paracellular permeability and <sup>22</sup>Na<sup>+</sup> transit kinetics, respectively. Lung mass and <sup>22</sup>Na<sup>+</sup> were then monitored for 60 min. At the conclusion of the experiment, lungs were lavaged as described previously (4) to assess TGF- $\beta$  levels and ELF volume. Lung mass was monitored continuously to assess net gain in mass over the experimental time-course, attributable to retention of extravascular lung water. The assessment of <sup>22</sup>Na<sup>+</sup> transit kinetics, resolution of transit kinetics into active and passive components, and calculation of the  $K_{t,c}$  have been described by the authors previously (3, 4).

**<sup>86</sup>Rb<sup>+</sup> Uptake Studies.** Uptake of the K<sup>+</sup> mimic <sup>86</sup>Rb<sup>+</sup> (1  $\mu$ Ci/mL) was used, in combination with the Na<sup>+</sup>/K<sup>+</sup>-ATPase inhibitor ouabain (1.67 mM) to assess Na<sup>+</sup>/K<sup>+</sup>-ATPase activity, exactly as described previously (3, 4).

**Patch-Clamp of Alveolar Epithelial Cells.** To investigate changes in macroscopic current of epithelial cells caused by TGF- $\beta$ 1, the conventional, whole-cell patch-clamp technique on human lung epithelial A549 cells (American Type Culture Collection) and alveolar type II (ATII) cells was performed (4). Stocks of amiloride (Sigma; 10 mM) and benzamil (Sigma; 1 mM) were made in DMSO, whereas TGF- $\beta$ 1 was dissolved in 4 mM HCl to get a 10  $\mu$ g/mL stock. A549 cells were grown on coverslips for 24–48 h, then on the day of the experiment they were treated for 30 min with vehicle, 1  $\mu$ M benzamil, 10 ng/mL TGF- $\beta$ 1, or the combination of benzamil and TGF- $\beta$ 1, diluted in the cell medium (DMEM F-12). ATII cells were prepared as described previously (4) and treated similarly. Coverslips were mounted in a flow-through chamber on the stage of an inverted microscope (Axiovert 135; Zeiss) and perfused (2–3 mL/min) with the bath solution containing vehicle, benzamil, or TGF- $\beta$ 1, respectively, by means of a gravity-driven perfusion system. Pipettes pulled from borosilicate glass capillaries (GC 150; Clark Electromedical Instruments)

were fire-polished to give a final resistance of 3–5 M $\Omega$ . The patch-clamp amplifier was Axopatch 200B (Axon Instruments) and EPC10 (HEKA Elektronik Dr. Schulze). The effective corner frequency of the low-pass filter was 5 kHz. The frequency of digitization was twice that of the filter frequency. The data were stored and analyzed using commercially available software (pCLAMP, Axon Instruments; PatchMaster, HEKA Elektronik Dr. Schulze). Experiments were performed at room temperature. A549 cells were perfused either with: 145 mM NaCl, 2.7 mM KCl, 1.8 mM CaCl<sub>2</sub>, 2 mM MgCl<sub>2</sub>, 5.5 mM glucose, 10 mM Hepes, pH 7.4 (bath-1, for experiments with amiloride, SB431542 and PO); or with: 135 mM Na-gluconate, 5 mM KCl, 1 mM CaCl<sub>2</sub>, 4 mM MgCl<sub>2</sub>, 10 mM Hepes, 5 mM glucose, 10 mM mannitol, pH 7.4 (bath 2, for experiments with benzamil). Pipettes were back-filled either with: 135 mM potassium methylsulfonic acid, 10 mM KCl, 6 mM NaCl, 1 mM Mg<sub>2</sub>ATP, 2 mM Na<sub>2</sub>ATP, 5.5 mM glucose, 10 mM Hepes, 1 mM EGTA, pH 7.2 (pipette-1), or 130 mM Na-gluconate, 2 mM Mg<sub>2</sub>ATP, 0.647 mM CaCl<sub>2</sub>, 10 mM Hepes, 1 mM EGTA, 5 mM glucose, pH 7.2 (pipette 2). Whole-cell currents of ATII cells were recorded in essential symmetrical sodium isethionate solutions (bath-3 and pipette-3 solutions). Bath-3 solution contained: 140 mM Na-isethionate, 5 mM K-isethionate, 10 mM Hepes, 1.2 mM MgSO<sub>4</sub>, 1 mM CaSO<sub>4</sub>, 5 mM glucose, pH 7.4. Pipette-2 solution contained 140 mM Na-isethionate, 5 mM K-isethionate, 10 mM Hepes, 1.2 mM MgSO<sub>4</sub>, 1 mM EGTA, 5 mM glucose, pH 7.2. Only those cells containing the granular inclusions typical of type II cell morphology were chosen for the study. Inward and outward currents across the cell membrane were elicited by using a step-pulse protocol from –100 to +60 mV in 10-mV (A549 cells) or 20-mV (ATII cells) increments for a duration of 500 ms or 800 ms (A549 cells) and 100 ms (ATII cells) from a holding potential of –40 mV or 0 mV (A549 cells) or 0 mV (ATII cells). Current–voltage (I–V) relationships were constructed by averaging the current values from 100 to 500 ms or 100–800 ms (A549 cells), and from 20 to 100 ms (ATII cells) from the start of the step pulse and plotted using Origin Software (Microcal Software).

**Quantitative Real-Time RT-PCR.** Real-time RT-PCR was undertaken exactly as described previously (1) to assess mRNA expression levels in cells and tissue homogenates, using the intron-spanning primers described in Table S1. Expression levels are represented as  $\Delta$ Ct values, using the ubiquitously expressed, pseudogene-free *hprt* gene as reference.

**Immunoblot and Antibodies.** The following antibodies were used and were diluted in 5% (wt/vol) nonfat milk powder, unless otherwise indicated: Smad2 (Cell Signaling; 3122; 1:1,000); Smad2/3 (Cell Signaling, 3102; 1:1,000); phospho-Smad2 (Cell Signaling; 3104; 1:1,000); phospholipase D1 [PLD1, Cell Signaling; 3832; 1:1,000 in 1% (wt/vol) BSA in PBS]; phosphatidylinositol-4-phosphate 5-kinase 1 $\alpha$  (PIP5K1 $\alpha$ ; Santa Cruz Biotechnology; 11724; 1:500); NOX4 (NAPDH oxidase 4; a gift from J. Hånze, Philipps University Marburg (5); 1:1,000); FLAG [Sigma, F-3165; 1,000 in 1% (wt/vol) BSA in PBS]; DDDDK-tag [Abcam, ab1257; 1000 in 1% (wt/vol) BSA in PBS]; V5 (Sigma; V-8012; 0.5  $\mu$ g/mL), rat  $\alpha$ ENaC (Sigma; E-4652; 1:1,000); Nedd4-2 [Abcam; ab46521 1:2,500 in 5% (wt/vol) BSA in PBST]; Ubiquitin (Santa Cruz Biotechnology; 8017; 1:5,000);  $\beta$ -Actin (Sigma-Aldrich; A2228, 1:50 000). Protein extracts were boiled, except for the detection of PLD1, where extracts were incubated at 70 °C for 10 min. Pull-down of V5-tagged  $\beta$ ENaC for ubiquitination assay: Anti V5 antibody (Sigma-Aldrich;

V8137, 5 µg/800 mg protein). Detection of βENaC with Anti-V5 antibody (Novex by Life Technologies; R96025, 1:2,500 in 5% BSA in PBST).

**Site-Directed Mutagenesis.** Site-directed mutagenesis was undertaken exactly as described previously (6), using the Quik-Change methodology of Stratagene. The primers used are listed in Table S1.

**Plasmid Sources and Construction.** Plasmids expressing FLAG-tagged mouse α-epithelial sodium channel (αENaC) and γENaC and V5-tagged βENaC were a gift from T. Kleyman, Renal-Electrolyte Division, Department of Medicine, University of Pittsburgh, Pittsburgh (7); wild-type and dominant-negative (K898R) (8) PLD1 were a gift from M. Frohman, Department of Pharmacological Sciences, Stony Brook University School of Medicine, Stony Brook, NY; wild-type and dominant-negative (K178A) PIP5K1α were a gift from K. Aoyagi, Department of Life Sciences, Graduate School of Arts and Sciences, University of Tokyo, Tokyo (9). The cloning of the *SCNN1A* (encoding αENaC), *SCNN1B* (encoding βENaC), and *SCNN1G* (encoding γENaC) genes from the human lung has already been reported by the authors (10). These constructs formed the basis of epitope-tagged clones to match the mouse clones described above. The *SCNN1A* and *SCNN1G* genes were amplified from these templates by PCR using the primers listed in Table S1 to generate amplicons that were cloned into the XhoI site of pCMV-Tag4A (Stratagene), generating expression constructs for C-terminal FLAG-tagged αENaC and γENaC, respectively. For βENaC, the XhoI site of pCMV-Tag4 was converted to an AgeI site, followed by a stop codon. The *SCNN1B* open-reading frame was amplified using the primers listed in Table S1 and cloned into the SacII site of pCDNA3.1/V5-His-TOPO (Invitrogen). The βENaC-V5 cassette was excised with NotI and AgeI, and cloned into the modified pCMV-Tag4 to generate an expression construct for a C-terminal V5-tagged βENaC.

**Transient Transfection of A549 and Murine Lung Epithelial-12 Cells.** All human ENaC constructs were expressed in human A549 cells, whereas mouse ENaC constructs were expressed in mouse lung epithelial (MLE)-12 cells. For transfection, 2.4 µg of DNA was combined with 2.4 µL of Lipofectamine 2000 (Invitrogen) in 2 mL of medium, which was applied to a 70% confluent cell monolayer for 5 h, after which medium was exchanged.

**Cell-Surface Biotinylation Studies.** Cell-surface biotinylation for ENaC subunits was undertaken essentially as described in ref. 11, using EZ-link Sulfo-NHS-SS-biotin (Pierce) with the following deviations: reactions were quenched with 100 mM glycine in PBS for 30 min (4 °C) before cell lysis, and the biotin pull-down proceeded overnight, not for 2 h. Unless otherwise indicated, both input and biotin pull-down fractions were resolved on the same SDS/PAGE gels, and developed on the same immunoblot, to facilitate comparison of the ENaC subunit bands from the cell-surface fraction with that from the total cellular pool.

**PLD Activity Assay.** The generation of [<sup>3</sup>H]phosphatidylbutanol (PBut) and [<sup>3</sup>H]phosphatidic acid (PA) was assessed exactly as described in ref. 12, after labeling A549 cells with [<sup>3</sup>H]myristic acid (3 µCi/mL) for 90 min in serum-free DMEM.

**RNA Interference Studies.** The following siRNA and doses were used in this study (all from Santa Cruz): Smad2 (SC-38374; 50 nM, 24 h) and Smad3 (SC-38376; 50 nM, 24 h), PLD1 (SC-44000; 50 nM, 24 h), PIP5K1α (SC-36232; 150 nM, 24 h), Nedd4-2 (SC-41079; 85 nM, 72 h). Scrambled siRNA was from Ambion (AM4611; 50 nM). For NOX4, the following siRNA were custom synthesized by Biomers. net: 5'-CCU CUU CUU UGU CUU CUAC dTdT-3' (sense) and

5'-GUA GAA GAC AAA GAA GAGG dTdT-3' (antisense) (13), and were used at 250 pmol per well of a six-well plate for 72 h.

**Assay for H<sub>2</sub>O<sub>2</sub> Formation.** The generation of reactive oxygen species (ROS) in response to TGF-β stimulation was assessed as a function of H<sub>2</sub>O<sub>2</sub> production using a fluorescence-based assay, essentially as described previously (14), with the following deviations: cells were preloaded with 2',7'-dichlorofluorescein diacetate (H<sub>2</sub>DCFH-DA; Molecular Probes) for 30 min at 37 °C in phenol red-free medium. Medium was then replaced with fresh medium containing the relevant pharmacological agent (except for siRNA transfections and EU.K.-134 application, which were performed 24 h before H<sub>2</sub>DCFH-DA preloading). After 30-min incubation, medium was replaced with medium containing TGF-β (or vehicle alone) plus the relevant pharmacological agent (or vehicle alone). After 30 min, cells were washed 1× with PBS, before assessment of 2',7'-dichlorofluorescein (DCF) fluorescence in a microplate spectrofluorimeter at λ<sub>ex</sub> 485 nm, λ<sub>em</sub> 520 nm.

**In Vivo Neutralization of TGF-β Signaling.** Animal investigations received government approval (Regierungspräsidium Darmstadt under approval number B2/348). The protocol used here is based on that of Zaiman et al. (15) who used an intraperitoneal administration of the SB431542 analog called SD-208 to chronically inhibit TGF-β signaling in the lung in rats. This methodology was very successfully used and demonstrated a role for Tgfr1/Smad signaling in the pathogenesis of pulmonary arterial hypertension. Our route of administration (oral gavage) and dosing regimen [60 mg/kg, twice daily, in a volume of 100 µL of 1% (wt/vol) methylcellulose dissolved in 0.9% (wt/vol) physiological saline] was identical to that previously established by Zaiman et al. (15). The efficiency of the neutralization of the Tgfr1/Smad2/3 signaling pathway was demonstrated in the lung parenchyma by assessment of Smad2 phosphorylation. Previously, Zaiman et al. (15) had used an identical Smad2 phosphorylation assessment to assess SD-208 efficacy in the pulmonary vasculature. The twice-daily administration of SD-208 was initiated 24 h after lung injury was induced by bleomycin administration, thus this was a therapeutic regimen. The bleomycin administration to induce lung injury, as a model for ARDS, is a well-established model in our Center, and was used exactly as described previously (16). Similarly, lung wet/dry ratios were calculated exactly as described previously (16).

**Use of *nox4*<sup>-/-</sup> Mice.** Animal investigations received government approval (Regierungspräsidium Darmstadt under approval number B2/353). Mice carrying a global deletion of *nox4* have been extensively characterized elsewhere (17). Lung injury was induced in these mice by bleomycin exactly as described previously, and lung fluid balance assessed by wet/dry ratio exactly as described above, for the in vivo neutralization of TGF-β signaling.

**Flow Cytometry.** Flow cytometry was undertaken as described previously by our group (18, 19). Human or mouse ATII cells were cultured for 3 d and treated with brefeldin A and TGF-β as described for A459 cells and ATII cells in the *Cell-Surface Biotinylation* and electrophysiology sections. Departures from our published protocols were restricted to the specific antibodies used: anti-αENaC [Sigma HPA012743 (0.2 mg/mL) subsequently diluted 1:50 in FACS buffer] or a nonimmune isotype-matched antibody (Sigma I-5006; 0.2 mg/mL; subsequently diluted 1:50 in FACS buffer). The secondary antibody was A-21245 [Alexa Fluor 647 Goat Anti-Rabbit IgG (H+L), highly cross-adsorbed] diluted 1:350 in FACS buffer for both nonimmune- and anti-αENaC-treated cells.

**Detection of Cysteine Oxidation in  $\beta$ ENaC.** The A549 cells were seeded in 60-mm cell-culture dishes and used for the study at 70% confluence. Cells were transfected with for 5 h with 2.4  $\mu$ g of V5-tagged  $\beta$ ENaC- or V5-tagged C43S  $\beta$ ENaC-expressing constructs using 6  $\mu$ L Lipofectamine 2000 transfection reagent (Invitrogen). On the following day, 5 mM 4-(3-azidopropyl)cyclohexane-1,3-dione (DAZ-2; Cayman Chemical) was added to the medium, and 15 min later cells were stimulated with 10 ng/mL TGF- $\beta$  for 30 min. Cells were then washed 3 $\times$  with PBS and lysed in 100  $\mu$ L lysis buffer [20 mM Tris-Cl pH 7.5; 150 mM NaCl; 1 mM EDTA; 1 mM EGTA; 0.5% Igepal CA-630 (Nonidet P-40); 1 mM Na<sub>3</sub>VO<sub>4</sub> and Complete Protease inhibitor]. After centrifugation at 3,000  $\times$  g for 20 min at 4  $^{\circ}$ C, the supernatant was collected and 250  $\mu$ L of protein was incubated with 200  $\mu$ M methyl 2-(diphenylphosphino)-4-(15-oxo-19-(2-oxohexahydro-1H-thieno[3,4-d]imidazol-4-yl)-4,7,10-trioxo-14-azanonadecylcarbamoyl)benzoate (Phosphine-biotin; Cayman Chemical) for 1 h at 37  $^{\circ}$ C with gentle agitation. To pull down proteins containing oxidized cysteine resi-

dues, 60  $\mu$ L of streptavidin beads were added to the reaction and the tubes were rotated overnight at 4  $^{\circ}$ C. Then, the beads were washed once with 150 mM NaCl; 50 mM Tris pH 7.4; 5 mM EDTA, twice with 500 mM NaCl; 50 mM Tris pH 7.4; 5 mM EDTA and three times with 500 mM NaCl; 20 mM Tris pH 7.4; 0.2% (wt/vol) BSA. After the final wash with 10 mM Tris pH 7.4, 20  $\mu$ L protein loading buffer was added to the reaction and the supernatant containing purified proteins was subjected to the SDS/PAGE and Western blot along with 5  $\mu$ g of the input. The V5-tagged  $\beta$ ENaC or V5-tagged C43S  $\beta$ ENaC were visualized using monoclonal anti V5-tag antibody (Sigma-Aldrich), as described for the regular biotinylation studies described above.

**Half-Life Determinations.** The surface half-lives of wild-type and C43S  $\beta$ ENaC were assessed by pulse-chase methodology exactly as described previously (20), as modified in (21), with cell-surface biotinylation.

- Alejandro-Alcázar MA, et al. (2007) Hyperoxia modulates TGF- $\beta$ /BMP signaling in a mouse model of bronchopulmonary dysplasia. *Am J Physiol Lung Cell Mol Physiol* 292(2):L537–L549.
- Kumarasamy A, et al. (2009) Lysyl oxidase activity is dysregulated during impaired alveolarization of mouse and human lungs. *Am J Respir Crit Care Med* 180(12):1239–1252.
- Vadász I, et al. (2005) Thrombin impairs alveolar fluid clearance by promoting endocytosis of Na<sup>+</sup>,K<sup>+</sup>-ATPase. *Am J Respir Cell Mol Biol* 33(4):343–354.
- Vadász I, et al. (2005) Oleic acid inhibits alveolar fluid reabsorption: A role in acute respiratory distress syndrome? *Am J Respir Crit Care Med* 171(5):469–479.
- Goyal P, et al. (2005) Identification of novel Nox4 splice variants with impact on ROS levels in A549 cells. *Biochem Biophys Res Commun* 329(1):32–39.
- Morty RE, Shih AY, Fülöp V, Andrews NW (2005) Identification of the reactive cysteine residues in oligopeptidase B from *Trypanosoma brucei*. *FEBS Lett* 579(10):2191–2196.
- Bruns JB, et al. (2003) Multiple epithelial Na<sup>+</sup> channel domains participate in subunit assembly. *Am J Physiol Renal Physiol* 285(4):F600–F609.
- Hammond SM, et al. (1997) Characterization of two alternately spliced forms of phospholipase D1. Activation of the purified enzymes by phosphatidylinositol 4,5-bisphosphate, ADP-ribosylation factor, and Rho family monomeric GTP-binding proteins and protein kinase C- $\alpha$ . *J Biol Chem* 272(6):3860–3868.
- Aoyagi K, et al. (2005) The activation of exocytotic sites by the formation of phosphatidylinositol 4,5-bisphosphate microdomains at syntaxin clusters. *J Biol Chem* 280(17):17346–17352.
- Fronius M, Bogdan R, Althaus M, Morty RE, Clauss WG (2010) Epithelial Na<sup>+</sup> channels derived from human lung are activated by shear force. *Respir Physiol Neurobiol* 170(1):113–119.
- Hanwell D, Ishikawa T, Saleki R, Rotin D (2002) Trafficking and cell surface stability of the epithelial Na<sup>+</sup> channel expressed in epithelial Madin-Darby canine kidney cells. *J Biol Chem* 277(12):9772–9779.
- O’Luanaigh N, et al. (2002) Continual production of phosphatidic acid by phospholipase D is essential for antigen-stimulated membrane ruffling in cultured mast cells. *Mol Biol Cell* 13(10):3730–3746.
- Li S, et al. (2008) NOX4 regulates ROS levels under normoxic and hypoxic conditions, triggers proliferation, and inhibits apoptosis in pulmonary artery adventitial fibroblasts. *Antioxid Redox Signal* 10(10):1687–1698.
- Dada LA, et al. (2003) Hypoxia-induced endocytosis of Na,K-ATPase in alveolar epithelial cells is mediated by mitochondrial reactive oxygen species and PKC- $\zeta$ . *J Clin Invest* 111(7):1057–1064.
- Zaiman AL, et al. (2008) Role of the TGF-beta/Alk5 signaling pathway in monocrotaline-induced pulmonary hypertension. *Am J Respir Crit Care Med* 177(8):896–905.
- Wygrecka M, et al. (2007) Cellular origin of pro-coagulant and (anti)-fibrinolytic factors in bleomycin-injured lungs. *Eur Respir J* 29(6):1105–1114.
- Zhang M, et al. (2010) NADPH oxidase-4 mediates protection against chronic load-induced stress in mouse hearts by enhancing angiogenesis. *Proc Natl Acad Sci USA* 107(42):18121–18126.
- Herold S, et al. (2008) Lung epithelial apoptosis in influenza virus pneumonia: The role of macrophage-expressed TNF-related apoptosis-inducing ligand. *J Exp Med* 205(13):3065–3077.
- Unkel B, et al. (2012) Alveolar epithelial cells orchestrate DC function in murine viral pneumonia. *J Clin Invest* 122(10):3652–3664.
- Comellas AP, et al. (2006) Hypoxia-mediated degradation of Na,K-ATPase via mitochondrial reactive oxygen species and the ubiquitin-conjugating system. *Circ Res* 98(10):1314–1322.
- Lecuona E, Sun H, Vohwinkel C, Ciechanover A, Sznajder JI (2009) Ubiquitination participates in the lysosomal degradation of Na,K-ATPase in steady-state conditions. *Am J Respir Cell Mol Biol* 41(6):671–679.

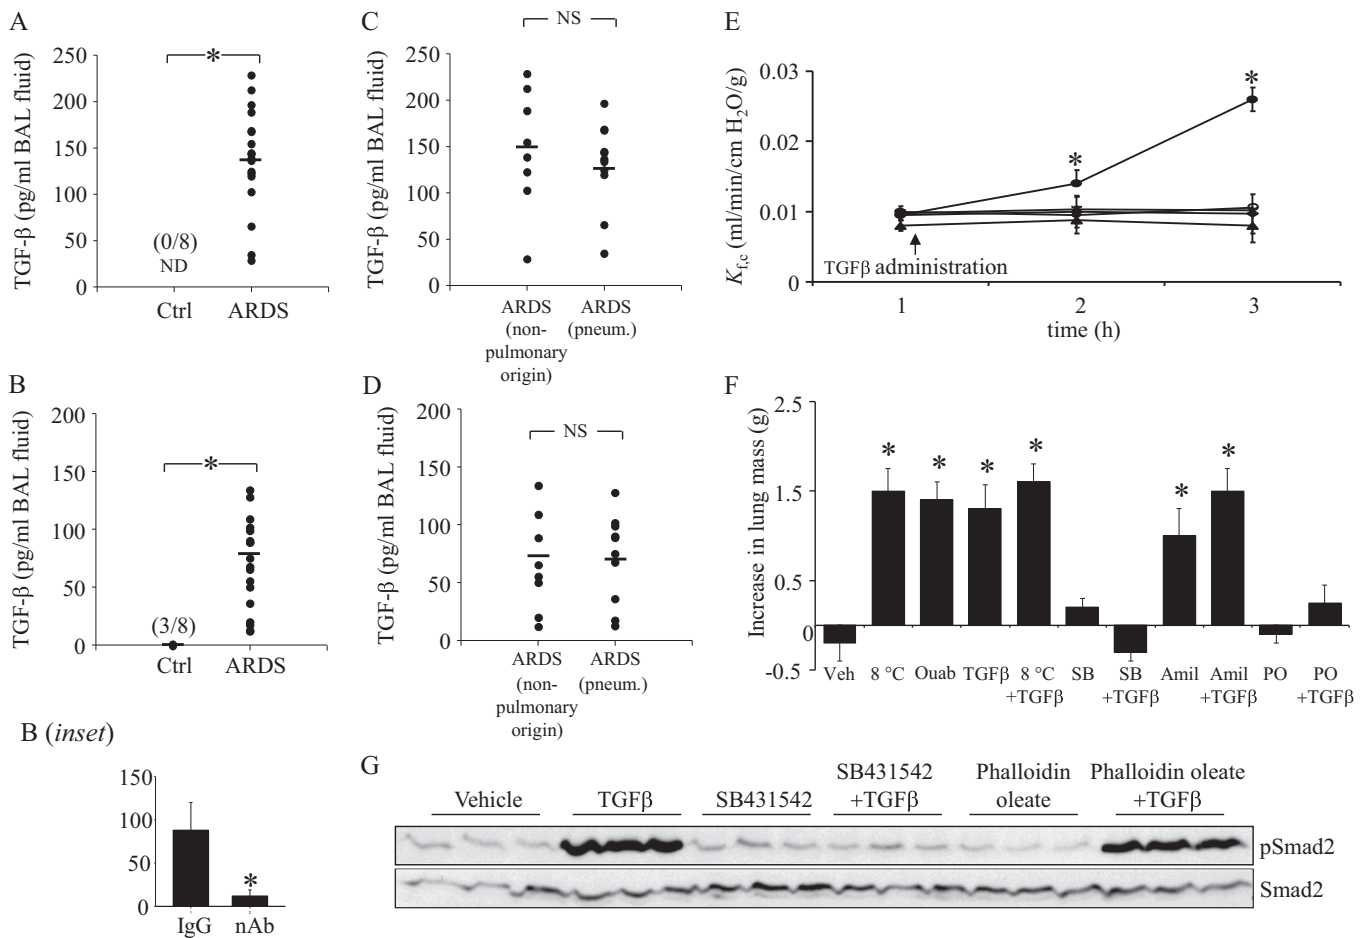

**Fig. 51.** Active TGF- $\beta$  is present in the lungs of patients with ARDS, and exogenous TGF- $\beta$  applied to the alveolar airspaces influences lung fluid retention after fluid challenge, but not endothelial permeability. Active TGF- $\beta$  levels were assessed by ELISA (**A**) or bioassay (**B**) in BAL fluids from mechanically ventilated patients with ARDS ( $n = 17$ ) and healthy volunteers ( $n = 8$ ). The bioassay was performed on ARDS patient samples in the presence of a TGF- $\beta$ 1, -2, -3 neutralizing IgG (nAb) or nonspecific IgG control (IgG) antibody (*inset*). (**C** and **D**) TGF- $\beta$  levels in patients with ARDS do not differ between patients groups with pulmonary vs. nonpulmonary origins of lung injury. Active TGF- $\beta$  levels were assessed by ELISA (**A**) or bioassay (**B**) in BAL fluids from 17 mechanically ventilated patients with ARDS: (*i*) eight patients with ARDS with nonpulmonary origins (sepsis,  $n = 5$ ; pancreatitis,  $n = 1$ ; other,  $n = 2$ ;  $53.7 \pm 7.7$  y; five male/three female; PaO<sub>2</sub>/FiO<sub>2</sub>,  $157.7 \pm 21.9$ ); and (*ii*) nine patients with ARDS resulting from pneumonia ( $47.8 \pm 5.0$  y; five male/four female; PaO<sub>2</sub>/FiO<sub>2</sub>,  $159.2 \pm 20.1$ ). (**E**) The effects of vehicle (open circle), low temperature (8 °C, diamond), TGF- $\beta$  (10 ng/mL, in the ELF; diamond), amiloride (10  $\mu$ M, in the ELF; cross), or oleic acid (25  $\mu$ M in perfusate; closed circle; as positive control) on lung capillary permeability were assessed by capillary filtration coefficient ( $K_{f,c}$ ) ( $n = 3$ , per group; \* indicates vs. vehicle). Data represent mean  $\pm$  SD, \* $P < 0.05$ . The steady-state lung mass (**F**) was assessed in isolated, ventilated, and perfused rabbit lungs pretreated with vehicle (Veh), low temperature (8 °C), ouabain (10  $\mu$ M), TGF- $\beta$ , SB431542 (SB), amiloride (Amil), phalloidin oleate (PO), or combinations thereof, 60 min after application of a 2-mL fluid challenge ( $n = 8$ , per group; \* indicates versus vehicle). (**G**) TGF- $\beta$  pathway activation assessed by Smad2 phosphorylation (pSmad2) in three representative lungs from **F**.

















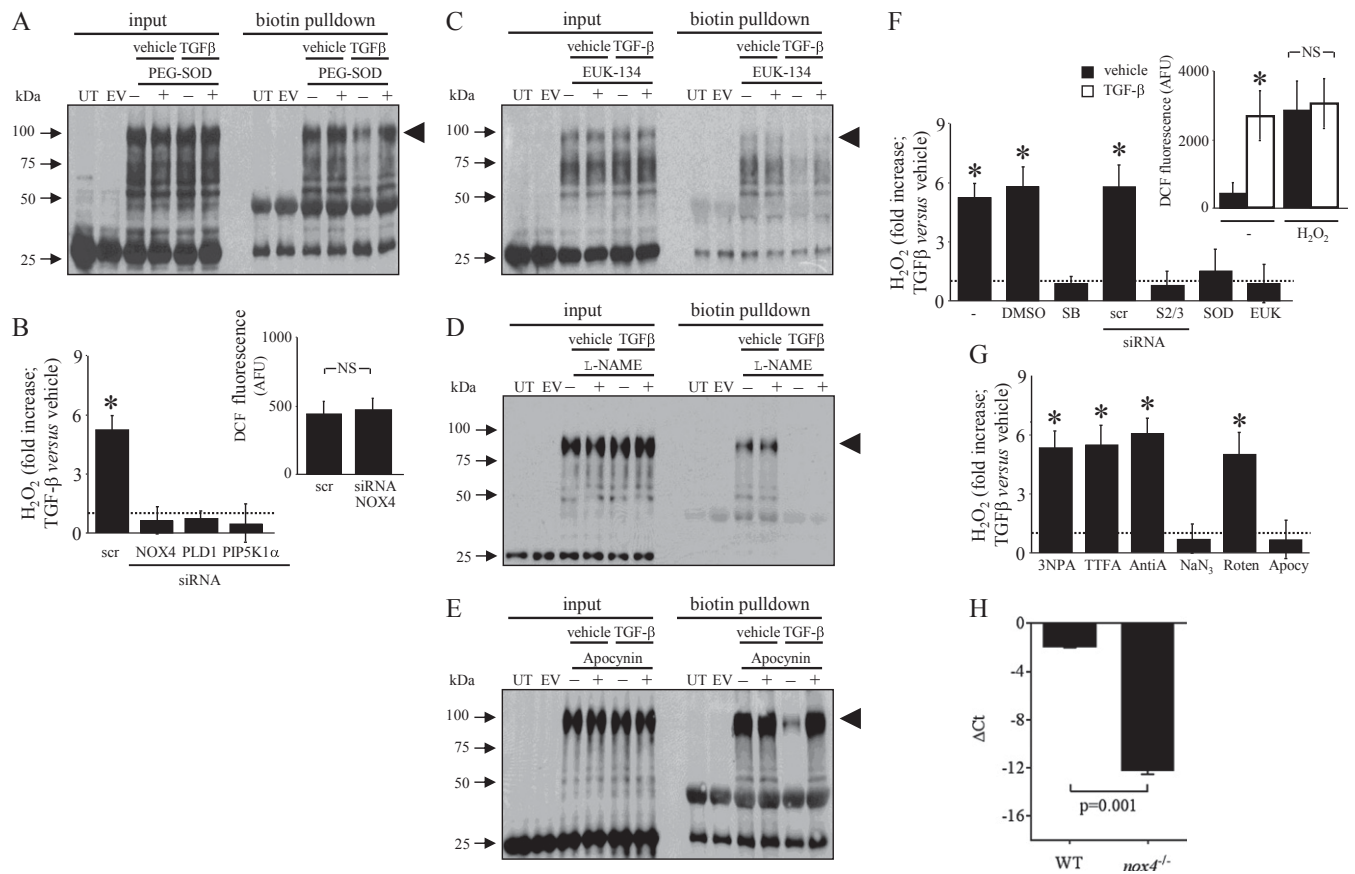

**Fig. S9.** TGF- $\beta$ -generated ROS are required for  $\beta$ ENaC endocytosis. (A) Effects of the ROS scavenger polyethylene glycol (PEG)-complexed superoxide dismutase (SOD) on TGF- $\beta$ -driven  $\beta$ ENaC endocytosis by A549 cells. (B) Effects of genetic ablation of *NOX4*, *PLD1*, and *PIP5K1A* by siRNA on TGF- $\beta$ -induced ROS production by A549 cells, and the effect of *NOX4* knockdown on baseline ROS levels (*Inset*) ( $n = 3$ , per group). The effects of the ROS scavenger EU.K.-134 (C), the nitric oxide synthase inhibitor L-NAME (100 mM) (D), and apocynin (300  $\mu$ M) (E) on TGF- $\beta$ -driven  $\beta$ ENaC internalization by A549 cells was also assessed. UT; untransfected; EV, empty vector-transfected. (F) TGF- $\beta$  pathway inhibitors and ROS scavengers were assessed for effects on TGF- $\beta$ -induced ROS production (measured as H<sub>2</sub>O<sub>2</sub>) by A549 cells: untreated (-), or treated with DMSO [0.1% (vol/vol)]; SB431542 (SB; 10  $\mu$ M); scrambled small-interfering (si)RNA (scr), siRNA targeting Smad2 and Smad3 (S2/3); PEG-complexed SOD (SOD; 150 U/mL); or EU.K.-134 (EU.K.; 20  $\mu$ M). Arbitrary fluorescence units (AFU) obtained with untreated or TGF- $\beta$ -treated naïve cells, without (-) or with addition of 100  $\mu$ M H<sub>2</sub>O<sub>2</sub> as positive control ( $n = 3$ , per group; *Inset*). (G) Inhibitors of the electron transport chain and NADPH oxidases were assessed for effects on TGF- $\beta$ -induced ROS production by A549 cells: 3-nitropropionic acid (3NPA; 5 mM), thenoyltrifluoroacetone (TTFA; 10  $\mu$ M), antimycin A (AntiA; 3  $\mu$ g/mL), rotenone (Roten; 10  $\mu$ M), NaN<sub>3</sub> (1 mM), and apocynin (300  $\mu$ M; Apocy) ( $n = 5$ , per group). Data represent mean  $\pm$  SD ( $n = 3$ , per group). \* $P < 0.05$ . UT; untransfected; EV, empty vector-transfected, Lam, laminin A/C. (H) Confirmation of genetic ablation of *Nox4* expression in *nox4*<sup>-/-</sup> mice, assessed by real-time RT-PCR using mRNA pools from whole-lung homogenates from wild-type and *nox4*<sup>-/-</sup> mice. Data represent mean  $\pm$  SD ( $n = 5$ , per group).

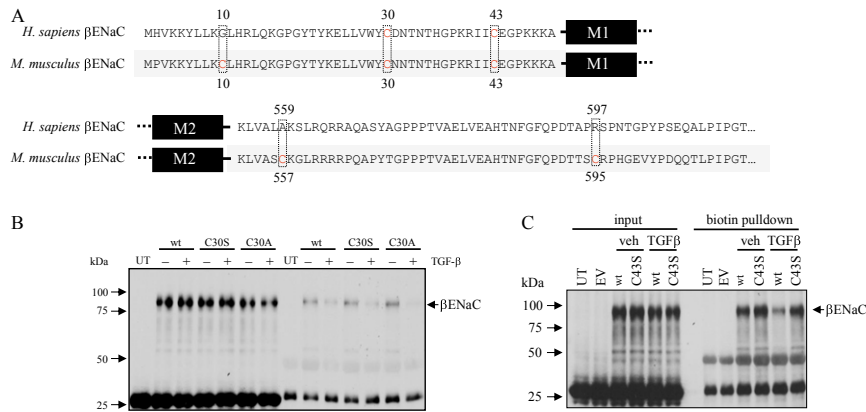

**Fig. S10.** TGF- $\beta$  signaling targets Cys<sup>43</sup> of  $\beta$ ENaC in mouse and human cells. (A) Comparison of the amino acid sequences of the cytosolic domains [regions proximal to the first transmembrane (M1) domain, and distal to the second transmembrane domain (M2)] of human and mouse  $\beta$ ENaC. (B) The impact of Cys<sup>43</sup> replacement with serine on human  $\beta$ ENaC endocytosis by A549 cells in response to TGF- $\beta$  (10 ng/mL; 30 min) was assessed by biotin pull-down. wt, wild-type. (C) The impact of Cys<sup>30</sup> residue replacement to serine or alanine on human  $\beta$ ENaC endocytosis by A549 cells in response to TGF- $\beta$  (10 ng/mL; 30 min) was assessed by biotin pull-down.

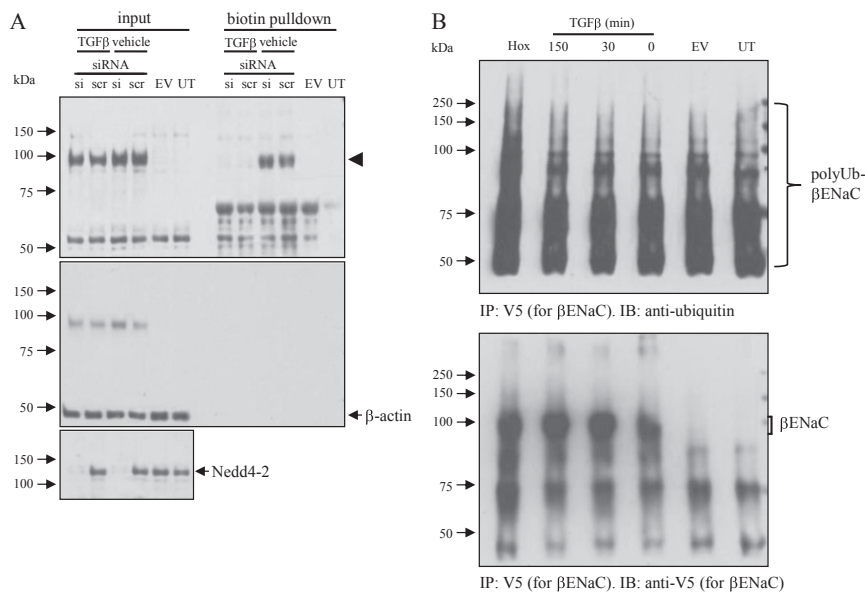

**Fig. S11.** Nedd4-2-mediated ubiquitination does not play a role in the effects of TGF- $\beta$  in ENaC trafficking. (A) Knockdown of Nedd4-2 by siRNA did not impact the ability of TGF- $\beta$  to drive internalization of  $\beta$ ENaC (*Top*). In this instance, the  $\beta$ ENaC blot was reprobed for  $\beta$ -actin to validate that the biotinylation procedure only detected surface-bound material. The  $\beta$ -actin band is only evident in the input, not the pull-down lane, and some residual  $\beta$ ENaC signal is still evident in the input as well (*Middle*). The siRNA-mediated knockdown of Nedd4-2 was validated by immunoblot (*Bottom*). (B) To support the data presented in A, the ubiquitination status of  $\beta$ ENaC was also assessed by immunoprecipitation of V5-tagged  $\beta$ ENaC, followed by probing for ubiquitin (*Upper*). No increase in poly-ubiquitinated  $\beta$ ENaC was evident in the smear indicated; however, hypoxia (1% O<sub>2</sub>, 4,5 h), which has been recognized as a stimulus for Nedd4-2-mediated ubiquitination of ENaC (1) did appreciably increase the intensity of the poly-ubiquitinated  $\beta$ ENaC smear. The blot was reprobed for V5-tagged  $\beta$ ENaC (*Lower*). UT, untransfected; EV, empty vector-transfected.

1. Gille T, et al. (2013) Hypoxia-induced inhibition of ENaC in the lung: Role of Nedd4-2 and the ubiquitin-proteasome pathway. *Am J Respir Cell Mol Biol*, in press.

**Table S1. Primers used in this study**

| Gene                                | Application               | Forward primer                          | Reverse primer                          |
|-------------------------------------|---------------------------|-----------------------------------------|-----------------------------------------|
| <i>nox4</i>                         | Expression analysis       | 5'-GGGATTGCTACTGCCTCCA-3'               | 5'-GAGTGACTCCAATGCCTCCA-3'              |
| <i>scnn1a</i> ( $\alpha$ ENaC)      | Expression analysis       | 5'-GTGTGCATTCACTCCTGC-3'                | 5'-CTGCACGGCTTCCTGCAC-3'                |
| <i>scnn1b</i> ( $\beta$ ENaC)       | Expression analysis       | 5'-GACAAGCTGCAACGCAAG-3'                | 5'-GGAAGTCCCTGTTGTTC-3'                 |
| <i>scnn1g</i> ( $\gamma$ ENaC)      | Expression analysis       | 5'-CCACCAGCTTGGCACAGT-3'                | 5'-ACTGTTGGCTGGCTCTC-3'                 |
| <i>SCNN1A</i> ( $\alpha$ ENaC)      | Expression analysis       | 5'-ggtggactggaaggactggaagatcg-3'        | 5'-atgaagttgcccagcgtgtcctcctc-3'        |
| <i>SCNN1B</i> ( $\beta$ ENaC)       | Expression analysis       | 5'-ttcatcaggacctacttgagctgg-3'          | 5'-ggcattggcatggcttagctcaggag-3'        |
| <i>SCNN1G</i> ( $\gamma$ ENaC)      | Expression analysis       | 5'-ctggagctaaggtgatcatccatcg-3'         | 5'-gcagcgtttagatgttctctgattg-3'         |
| <i>hprt</i>                         | Expression analysis       | 5'-GATGATCTCTCAACTTTA-3'                | 5'-AGTCTGGCCTGTATCCAA-3'                |
| <i>HPRT</i>                         | Expression analysis       | 5'-AAGGACCCACGAAGTGTG-3'                | 5'-GGCTTTGTATTTTGCTTTTCCA-3'            |
| <i>SCNN1A</i> ( $\alpha$ ENaC)      | Cloning                   | 5'-CTCGAGATGGAGGGGAACAAGCTGGAG-3'       | 5'-CTCGAGGGGCCCCCAGAGGACAGGT-3'         |
| <i>SCNN1B</i> ( $\beta$ ENaC)       | Cloning                   | 5'-CCGCGGATgcacgtgaagaagtacctg-3'       | 5'- CCGCGGGATGGCATCACCTCACTGTC-3'       |
| <i>SCNN1G</i> ( $\gamma$ ENaC)      | Cloning                   | 5'-ctcgagatggcaccggagagaagatc-3'        | 5'-CTCGAGGAGCTCATCCAGCATCTGGGT-3'       |
| pCMV-Tag4B (vector)                 | Site-directed mutagenesis | 5'-GATACCGTCGACACCGGTTAATACAAGGATGAC-3' | 5'-GTCATCCTTGTATTAACCGGTGTCGACGGTATC-3' |
| <i>scnn1b</i> ( $\beta$ ENaC C10A)  | Site-directed mutagenesis | 5'-AAGTACCTCCTGAAGGCCCTGCACCGGCTGCAG-3' | 5'-CTGCAGCCGGTGCAGGGCCTTCAGGAGTACTT-3'  |
| <i>scnn1b</i> ( $\beta$ ENaC C10S)  | Site-directed mutagenesis | 5'-AAGTACCTCCTGAAGAGCCTGCACCGGCTGCAG-3' | 5'-CTGCAGCCGGTGCAGGCTCTTCAGGAGTACTT-3'  |
| <i>scnn1b</i> ( $\beta$ ENaC C30A)  | Site-directed mutagenesis | 5'-CTGCTAGTGTGGTACGCCAATAACACCAACACC-3' | 5'-GGTGTGGTGTATTGGCGTACCACACTAGCAG-3'   |
| <i>scnn1b</i> ( $\beta$ ENaC C30S)  | Site-directed mutagenesis | 5'-CTGCTAGTGTGGTACAGCAATAACACCAACACC-3' | 5'-GGTGTGGTGTATTGCTGTACCACACTAGCAG-3'   |
| <i>scnn1b</i> ( $\beta$ ENaC C43A)  | Site-directed mutagenesis | 5'-CCCAAACGCATCATCGTGTAGGGGCCAAGAAG-3'  | 5'-CTTCTTGGGCCCTCAGCGATGATGCGTTTCCC-3'  |
| <i>scnn1b</i> ( $\beta$ ENaC C43S)  | Site-directed mutagenesis | 5'-CCCAAACGCATCATCAGTGTAGGGGCCAAGAAG-3' | 5'-CTTCTTGGGCCCTCACTGATGATGCGTTTCCC-3'  |
| <i>scnn1b</i> ( $\beta$ ENaC C557A) | Site-directed mutagenesis | 5'-AAGCTGGTGGCCTCCGCCAAGGCTGCGCAGG-3'   | 5'-CCTGCGCAGGCTTTGGCGGAGGCCACCAGCTT-3'  |
| <i>scnn1b</i> ( $\beta$ ENaC C557S) | Site-directed mutagenesis | 5'-AAGCTGGTGGCCTCCAGCAAAGGCTGCGCAGG-3'  | 5'-CCTGCGCAGGCTTTGTGAGGACCACCAGCTT-3'   |
| <i>scnn1b</i> ( $\beta$ ENaC C595A) | Site-directed mutagenesis | 5'-CCTGACACAACCAGCGCCAGGCCACGGCGAG-3'   | 5'-CTCGCGTGGGGCCTGGCGCTGGTGTGTCAGG-3'   |
| <i>scnn1b</i> ( $\beta$ ENaC C595S) | Site-directed mutagenesis | 5'-CCTGACACAACCAGCAGCAGGCCACGGCGAG-3'   | 5'-CTCGCGTGGGGCCTGCTGCTGGTGTGTCAGG-3'   |
| <i>SCNN1B</i> ( $\beta$ ENaC C30S)  | Site-directed mutagenesis | 5'-CTGCTGGTGTGGTACTCCGACAACACCAACACC-3' | 5'-GGTGTGGTGTGTCGGAGTACCACACCAGCAG-3'   |
| <i>SCNN1B</i> ( $\beta$ ENaC C43S)  | Site-directed mutagenesis | 5'-CCCAAACGCATCATCTCTGAGGGGCCAAGAAG-3'  | 5'-CTTCTTGGGCCCTCAGAGATGATGCGCTTGGG-3'  |

By convention, mouse genes are indicated in lowercase, and human genes in uppercase. Engineered restriction sites are indicated in bold type, and engineered stop-codons are underlined.
